# Supplementary material for: Vacation Days Taken, Work During Vacation, and Burnout Among US Physicians
Source: PubMed Central journal article supplement (PMC10787314; doi:10.1001/jamanetworkopen.2023.51635), 2024-01-12
Supplement: jamanetwopen-e2351635-s002.pdf [file jamanetwopen-e2351635-s002.pdf]

## **Data Sharing Statement**

Sinsky. Vacation Days Taken, Work During Vacation, and Burnout Among US Physicians.  
*JAMA Netw Open*. Published January 12, 2024. doi:10.1001/jamanetworkopen.2023.51635

### **Data**

**Data available:** No
